# Supplementary material for: Thermoelectric properties of Bi1−xPbxCu1−xSeO oxyselenides
Source: Royal Society of Chemistry journal article supplement (doi:10.1039/d4cp00308j), 2024-01-01
Supplement: d4cp00308j1.pdf [file d4cp00308j1.pdf]

— Supplementary Information —

**Thermoelectric Properties of  $\text{Bi}_{1-x}\text{Pb}_x\text{Cu}_{1-x}\text{SeO}$**

**Oxyselenides**

Aleksandra Khanina,<sup>\*,†</sup> Andrei Novitskii,<sup>‡</sup> Daria Pashkova,<sup>‡</sup> Andrei Voronin,<sup>†</sup> Takao Mori,<sup>‡,¶</sup> and  
Vladimir Khovaylo<sup>\*,†,§</sup>

<sup>†</sup>*Academic Research Center for Energy Efficiency, National University of Science and Technology MISIS,  
Leninsky Av. 4, Moscow, 119049, Russia.*

<sup>‡</sup>*International Center for Materials Nanoarchitectonics (WPI-MANA), National Institute for Materials  
Science (NIMS), 1-1 Namiki, Tsukuba, Ibaraki, 305-0044, Japan.*

<sup>¶</sup>*Graduate School of Pure and Applied Sciences, University of Tsukuba, 1-1-1 Tennodai, Tsukuba, Ibaraki,  
305-8573, Japan.*

<sup>§</sup>*Belgorod State University, Pobedy St. 85, Belgorod, 308015, Russia.*

E-mail: [khanina.as@misis.ru](mailto:khanina.as@misis.ru); [khovaylo@misis.ru](mailto:khovaylo@misis.ru)

## Energy-Dispersive X-ray Spectroscopy (EDS)

| Nominal composition                                          | (Bi + Pb):Cu:Se | Pb   |
|--------------------------------------------------------------|-----------------|------|
| BiCuSeO                                                      | 1.04:1.00:0.96  | 0    |
| Bi <sub>0.98</sub> Pb <sub>0.02</sub> Cu <sub>0.98</sub> SeO | 1.01:0.99:0.98  | 0.01 |
| Bi <sub>0.94</sub> Pb <sub>0.06</sub> Cu <sub>0.94</sub> SeO | 1.06:0.94:0.95  | 0.06 |
| Bi <sub>0.92</sub> Pb <sub>0.08</sub> Cu <sub>0.92</sub> SeO | 1.02:0.94:0.96  | 0.08 |

Table S1: Elemental ratios and Pb concentration obtained by EDS analysis for the Bi<sub>1-x</sub>Pb<sub>x</sub>Cu<sub>1-x</sub>SeO ( $x = 0, 0.02, 0.06, \text{ and } 0.08$ ).

## Weighted Mobility

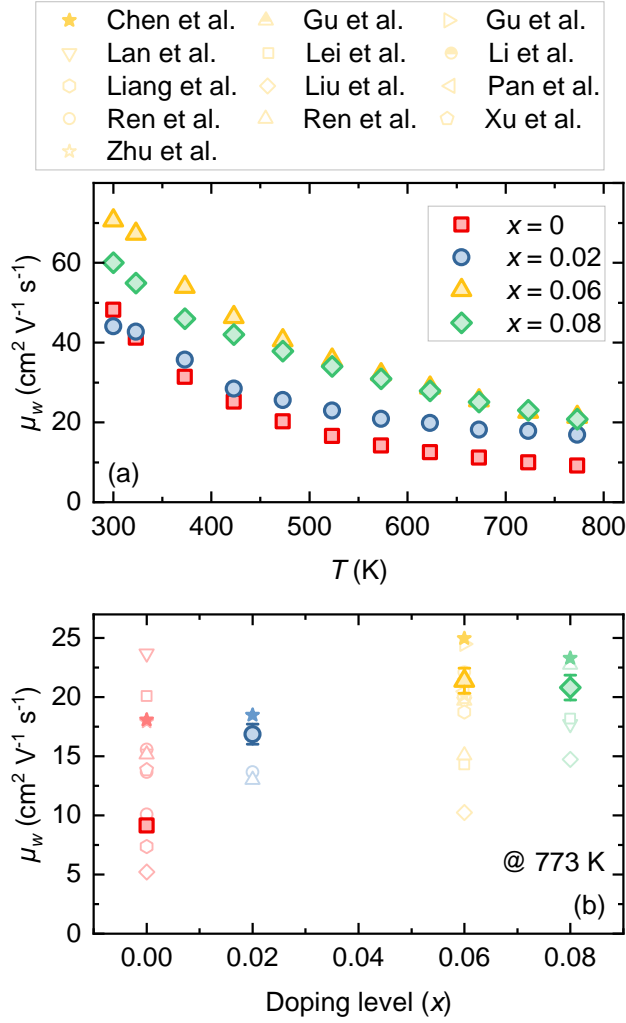

Figure S1: (a) Temperature and (b) concentration dependencies of the weighted mobility  $\mu_w$  for  $\text{Bi}_{1-x}\text{Pb}_x\text{Cu}_{1-x}\text{SeO}$  ( $x = 0, 0.02, 0.06, \text{ and } 0.08$ ) samples. In (b), literature data for other  $\text{Bi}_{1-x}\text{Pb}_x\text{CuSeO}$ -based oxyselenides are also shown for comparison (Chen et al.,<sup>1</sup> Gu et al.,<sup>2,3</sup> Lan et al.,<sup>4</sup> Lei et al.,<sup>5</sup> Li et al.,<sup>6</sup> Liang et al.,<sup>7</sup> Liu et al.,<sup>8</sup> Pan et al.,<sup>9</sup> Ren et al.,<sup>10,11</sup> Xu et al.,<sup>12</sup> Zhu et al.<sup>13</sup>); all displayed data points correspond to values obtained at  $773 \text{ K}$ .

# Jonker Plot

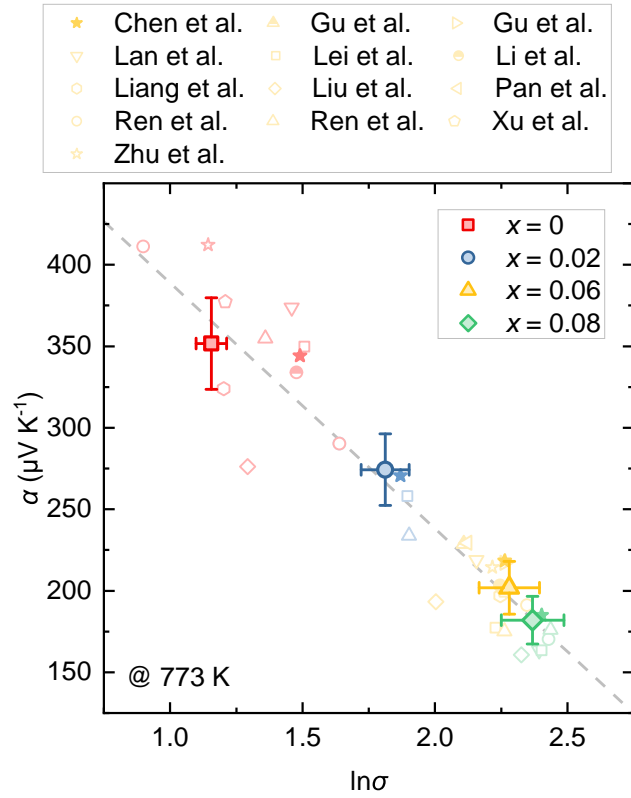

Figure S2: Seebeck coefficient as a function of  $\ln\sigma$  for  $\text{Bi}_{1-x}\text{Pb}_x\text{Cu}_{1-x}\text{SeO}$  ( $x = 0, 0.02, 0.06,$  and  $0.08$ ) samples. Literature data for other  $\text{Bi}_{1-x}\text{Pb}_x\text{CuSeO}$ -based oxyselenides are also shown for comparison (Chen et al.,<sup>1</sup> Gu et al.,<sup>2,3</sup> Lan et al.,<sup>4</sup> Lei et al.,<sup>5</sup> Li et al.,<sup>6</sup> Liang et al.,<sup>7</sup> Liu et al.,<sup>8</sup> Pan et al.,<sup>9</sup> Ren et al.,<sup>10,11</sup> Xu et al.,<sup>12</sup> Zhu et al.<sup>13</sup>). All displayed data points correspond to values obtained at 773 K. The dashed line is a guide for the eyes.

## Power Factor

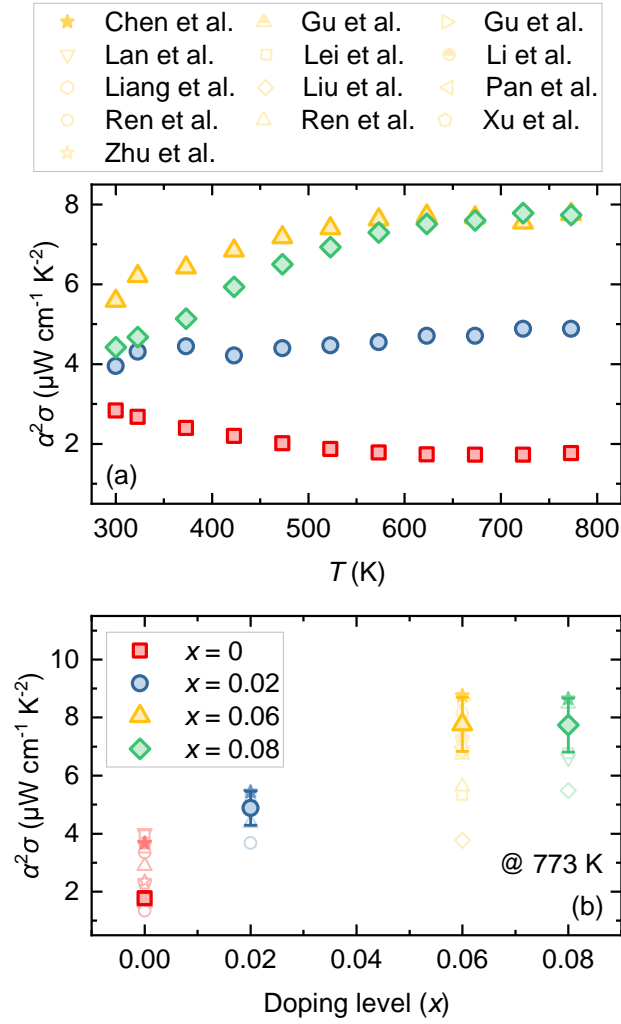

Figure S3: (a) Temperature and (b) concentration dependencies of the power factor  $\alpha^2\sigma$  for  $\text{Bi}_{1-x}\text{Pb}_x\text{Cu}_{1-x}\text{SeO}$  ( $x = 0, 0.02, 0.06, \text{ and } 0.08$ ) samples. In (b), literature data for other  $\text{Bi}_{1-x}\text{Pb}_x\text{CuSeO}$ -based oxyselenides are also shown for comparison (Chen et al.,<sup>1</sup> Gu et al.,<sup>2,3</sup> Lan et al.,<sup>4</sup> Lei et al.,<sup>5</sup> Li et al.,<sup>6</sup> Liang et al.,<sup>7</sup> Liu et al.,<sup>8</sup> Pan et al.,<sup>9</sup> Ren et al.,<sup>10,11</sup> Xu et al.,<sup>12</sup> Zhu et al.<sup>13</sup>); all displayed data points correspond to values obtained at 773 K.

# Thermal Conductivity

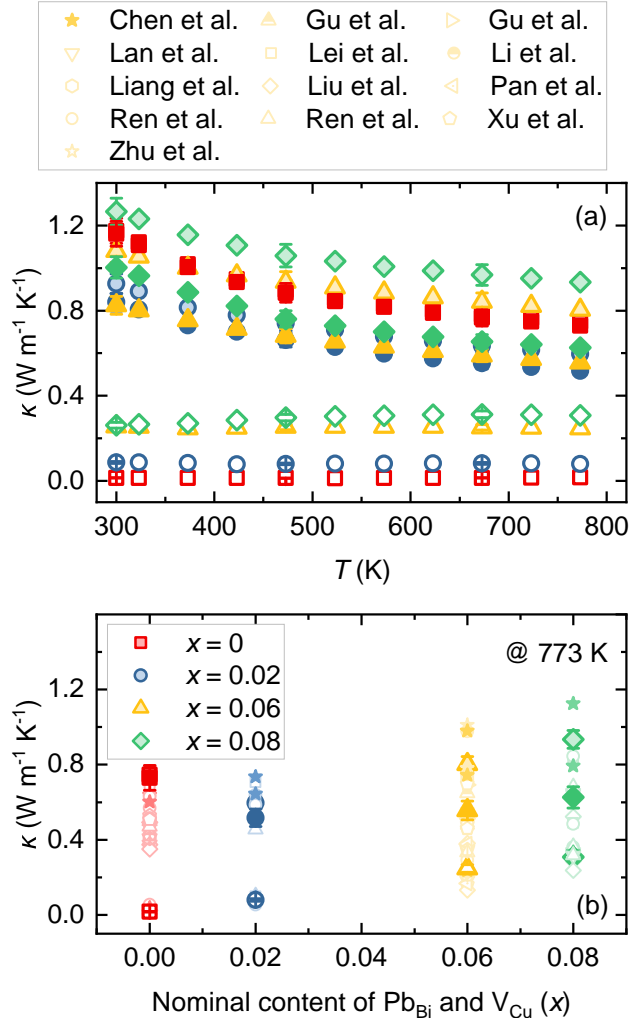

Figure S4: (a) Temperature and (b) concentration dependencies of the total  $\kappa_{tot}$ , lattice  $\kappa_{lat}$  (solid symbols), and electronic  $\kappa_{el}$  (empty symbols) thermal conductivity for Bi<sub>1-x</sub>Pb<sub>x</sub>Cu<sub>1-x</sub>SeO ( $x = 0, 0.02, 0.06, \text{ and } 0.08$ ) samples. In (b), literature data for other Bi<sub>1-x</sub>Pb<sub>x</sub>CuSeO-based oxyselenides are also shown for comparison (Chen et al.,<sup>1</sup> Gu et al.,<sup>2,3</sup> Lan et al.,<sup>4</sup> Lei et al.,<sup>5</sup> Li et al.,<sup>6</sup> Liang et al.,<sup>7</sup> Liu et al.,<sup>8</sup> Pan et al.,<sup>9</sup> Ren et al.,<sup>10,11</sup> Xu et al.,<sup>12</sup> Zhu et al.<sup>13</sup>); all displayed data points correspond to values obtained at 773 K.

## Lattice Thermal Conductivity

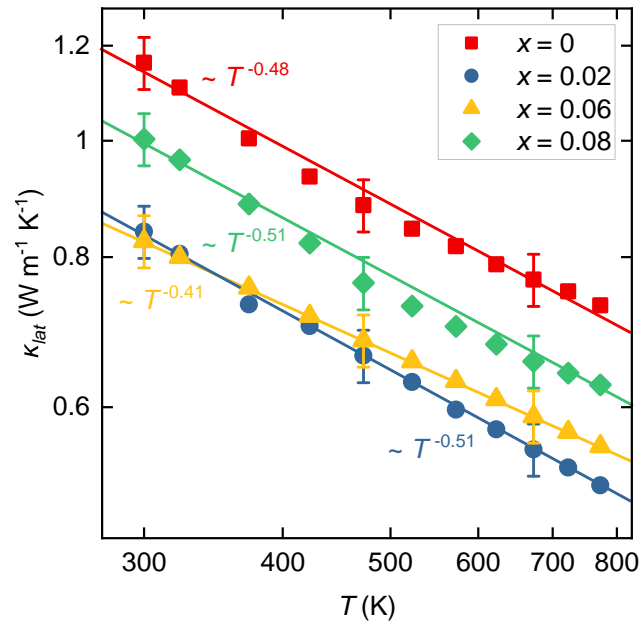

Figure S5: Temperature dependence of the lattice thermal conductivity  $\kappa_{lat}$  in a log-log scale for  $\text{Bi}_{1-x}\text{Pb}_x\text{Cu}_{1-x}\text{SeO}$  ( $x = 0, 0.02, 0.06, \text{ and } 0.08$ ) samples.

# Lattice Thermal Conductivity and Figure-of-Merit

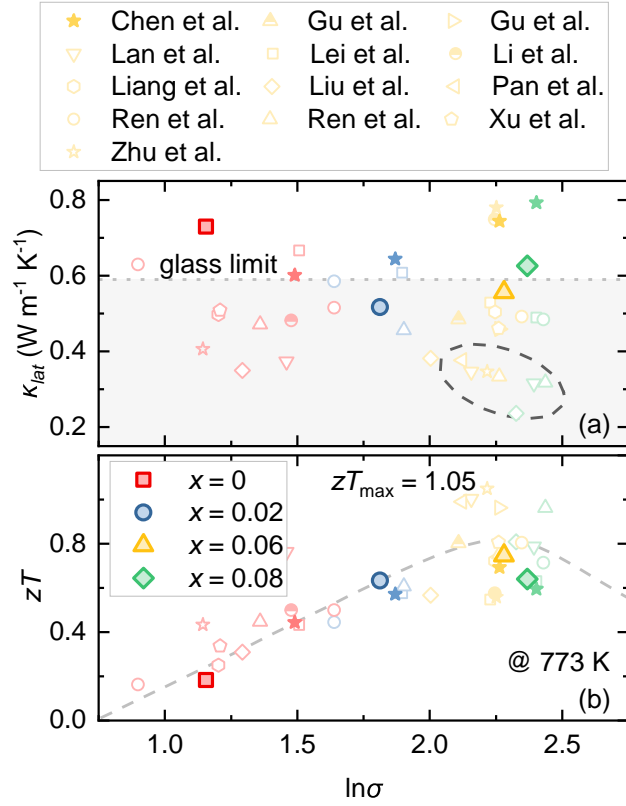

Figure S6: (a) Lattice thermal conductivity  $\kappa_{lat}$  and (b) figure-of-merit  $zT$  as functions of  $\ln\sigma$  for  $\text{Bi}_{1-x}\text{Pb}_x\text{Cu}_{1-x}\text{SeO}$  ( $x = 0, 0.02, 0.06, \text{ and } 0.08$ ) samples. In (b), literature data for other  $\text{Bi}_{1-x}\text{Pb}_x\text{CuSeO}$ -based oxyselenides are also shown for comparison (Chen et al.,<sup>1</sup> Gu et al.,<sup>2,3</sup> Lan et al.,<sup>4</sup> Lei et al.,<sup>5</sup> Li et al.,<sup>6</sup> Liang et al.,<sup>7</sup> Liu et al.,<sup>8</sup> Pan et al.,<sup>9</sup> Ren et al.,<sup>10,11</sup> Xu et al.,<sup>12</sup> Zhu et al.<sup>13</sup>); all displayed data points correspond to values obtained at 773 K.



## References

- (1) Chen, Y.-X.; Shi, K.-D.; Li, F.; Xu, X.; Ge, Z.-H.; He, J. Highly enhanced thermoelectric performance in BiCuSeO ceramics realized by Pb doping and introducing Cu deficiencies. *Journal of the American Ceramic Society* **2019**, *102*, 5989–5996.
- (2) Gu, Y.; Shi, X.-L.; Pan, L.; Liu, W.-D.; Sun, Q.; Tang, X.; Kou, L.-Z.; Liu, Q.-F.; Wang, Y.-F.; Chen, Z.-G. Rational electronic and structural designs advance BiCuSeO thermoelectrics. *Advanced Functional Materials* **2021**, *31*, 2101289.
- (3) Gu, Y.; Ai, W.; Pan, L.; Hu, X.; Zong, P.; Chen, C.; Lu, C.; Xu, Z.; Wang, Y. High thermoelectric performance of BiCuSeO via minimizing the electronegativity difference in Bi–O layer. *Materials Today Physics* **2022**, *24*, 100688.
- (4) Lan, J.-L.; Liu, Y.-C.; Zhan, B.; Lin, Y.-H.; Zhang, B.; Yuan, X.; Zhang, W.; Xu, W.; Nan, C.-W. Enhanced thermoelectric properties of Pb-doped BiCuSeO ceramics. *Advanced Materials* **2013**, *25*, 5086–5090.
- (5) Lei, Y.; Zheng, R.; Yang, H.; Li, Y.; Yong, C.; Jiang, X.; Liu, R.; Wan, R. Microwave synthesis combined with SPS sintering to fabricate Pb doped p-type BiCuSeO oxyselenides thermoelectric bulks in a few minutes. *Scripta Materialia* **2021**, *199*, 113885.
- (6) Li, F.; Zheng, Z.; Chang, Y.; Ruan, M.; Ge, Z.; Chen, Y.; Fan, P. Synergetic tuning of the electrical and thermal transport properties via Pb/Ag dual doping in BiCuSeO. *ACS applied materials & interfaces* **2019**, *11*, 45737–45745.
- (7) Liang, X.; Xu, R.; Kong, M.; Wan, H.; Bai, W.; Dong, D.; Li, Q.; Xu, H.; Li, Z.; Ge, B.; others Raising the thermoelectric performance in Pb/In-codoped BiCuSeO by alleviating the contradiction between carrier mobility and lattice thermal conductivity. *Materials Today Physics* **2023**, *34*, 101084.
- (8) Liu, Y.-c.; Lan, J.-L.; Zhan, B.; Ding, J.; Liu, Y.; Lin, Y.-H.; Zhang, B.; Nan, C.-w. Thermoelectric Properties of Pb-Doped BiCuSeO Ceramics. *Journal of the American Ceramic Society* **2013**, *96*, 2710–2713.
- (9) Pan, L.; Lang, Y.; Zhao, L.; Berardan, D.; Amzallag, E.; Xu, C.; Gu, Y.; Chen, C.; Zhao, L.-D.; Shen, X.; others Realization of n-type and enhanced thermoelectric performance of p-type BiCuSeO by controlled iron incorporation. *Journal of Materials Chemistry A* **2018**, *6*, 13340–13349.

- (10) Ren, G.-K.; Butt, S.; Ventura, K. J.; Lin, Y.-H.; Nan, C.-W.; others Enhanced thermoelectric properties in Pb-doped BiCuSeO oxyselenides prepared by ultrafast synthesis. *RSC advances* **2015**, *5*, 69878–69885.
- (11) Ren, G.-K.; Wang, S.; Zhou, Z.; Li, X.; Yang, J.; Zhang, W.; Lin, Y.-H.; Yang, J.; Nan, C.-W. Complex electronic structure and compositing effect in high performance thermoelectric BiCuSeO. *Nature communications* **2019**, *10*, 2814.
- (12) Xu, R.; Chen, Z.; Li, Q.; Yang, X.; Wan, H.; Kong, M.; Bai, W.; Zhu, N.; Wang, R.; Song, J.; others Realizing Plain Optimization of the Thermoelectric Properties in BiCuSeO Oxide via Self-Substitution-Induced Lattice Dislocations. *Research* **2023**, *6*, 0123.
- (13) Zhu, H.; Li, Z.; Zhao, C.; Li, X.; Yang, J.; Xiao, C.; Xie, Y. Efficient interlayer charge release for high-performance layered thermoelectrics. *National Science Review* **2021**, *8*, nwaa085.
